# Supplementary material for: Validation of Progression-Free Survival Rate at 6 Months and Objective Response for Estimating Overall Survival in Immune Checkpoint Inhibitor Trials: A Systematic Review and Meta-analysis
Source: PubMed Central journal article supplement (PMC7489825; doi:10.1001/jamanetworkopen.2020.11809), 2020-09-08
Supplement: jamanetwopen-e2011809-s001.pdf [file jamanetwopen-e2011809-s001.pdf]

## Supplementary Online Content

Kok P-S, Cho D, Yoon W-H, et al. Validation of progression-free survival rate at 6 months and objective response rate for estimating overall survival in immune checkpoint inhibitor trials: a systematic review and meta-analysis. *JAMA Netw Open*. 2020;3(9):e2011809. doi:10.1001/jamanetworkopen.2020.11809

**eTable 1.** Predictive Models Developed From Training Data Set to Estimate End Points

**eTable 2.** Summary of Included Trials

**eTable 3.** Summary of Immune Checkpoint Inhibitor Arms in Included Trials

**eFigure 1.** Six-Month Progression Free Survival Model–Predicted vs Observed 12-Month Overall Survival in Immune Checkpoint Inhibitor Arms in the Subgroups and Validation Trial Data Set

**eFigure 2.** Objective Response Rate Model–Predicted vs Observed 12-Month Overall Survival in Immune Checkpoint Inhibitor Arms in the Subgroups and Validation Trial Data Set

**eFigure 3.** Correlations Between Objective Response Rate and 12-Month Overall Survival in Immune Checkpoint Inhibitor Arms in the Subgroups and Entire Trial Data Set

### **eReferences**

This supplementary material has been provided by the authors to give readers additional information about their work.

**eTable 1.** Predictive Models Developed From Training Data Set to Estimate End Points

| <b>Model from 20 RCTs</b>          | <b>Model equation</b>                                                                                                                                    |
|------------------------------------|----------------------------------------------------------------------------------------------------------------------------------------------------------|
| PFS6 to predict OS12               | $OS12 = (1.06 \times PFS6) + 0.16 + (0.04 \times \text{melanoma}) - (0.03 \times \text{NSCLC}) + (0 \times \text{other tumors})$                         |
| ORR to predict OS12                | $OS12 = (0.15 \times \text{ORR}) + 0.52 + (0 \times \text{melanoma}) - (0.02 \times \text{NSCLC}) - (0.01 \times \text{other tumors})$                   |
| <b>Refitted model from 60 RCTs</b> |                                                                                                                                                          |
| ORR to predict OS12                | $OS12 = (1.012324 \times \text{ORR}) + 0.3006825 + (0 \times \text{melanoma}) + (0.0021079 \times \text{NSCLC}) - (0.038521 \times \text{other tumors})$ |

Abbreviation: PFS6, 6-month progression-free survival rate; OS12, 12-month overall survival rate; ORR, objective response rate; NSCLC, non-small cell lung cancer

**eTable 2.** Summary of Included Trials

| Trial                        | Treatment comparisons | Phase | Tumour                  | Line | Experimental arm                                                                 | Selected PD-L1 population | Sample size of ICI arm |
|------------------------------|-----------------------|-------|-------------------------|------|----------------------------------------------------------------------------------|---------------------------|------------------------|
| <b>Training dataset</b>      |                       |       |                         |      |                                                                                  |                           |                        |
| Checkmate 017 <sup>1</sup>   | ICI vs C              | 3     | NSCLC                   | 2    | Nivolumab                                                                        | No                        | 135                    |
| Checkmate 025 <sup>2</sup>   | ICI vs C              | 3     | Renal                   | 2    | Nivolumab                                                                        | No                        | 410                    |
| Checkmate 037 <sup>3,4</sup> | ICI vs C              | 3     | Melanoma                | 2    | Nivolumab                                                                        | No                        | 272                    |
| Checkmate 057 <sup>5</sup>   | ICI vs C              | 3     | NSCLC                   | 2    | Nivolumab                                                                        | No                        | 292                    |
| Checkmate 141 <sup>6</sup>   | ICI vs C              | 3     | Head and Neck SCC       | 2    | Nivolumab                                                                        | No                        | 240                    |
| Checkmate 066 <sup>7</sup>   | ICI-C vs C            | 3     | Melanoma                | 1    | Nivolumab + Dacarbazine                                                          | No                        | 210                    |
| Checkmate 026 <sup>8</sup>   | ICI vs C              | 3     | NSCLC                   | 1    | Nivolumab                                                                        | Yes                       | 271                    |
| Attraction2 <sup>9</sup>     | ICI vs Placebo        | 3     | Gastric/<br>Oesophageal | 3    | Nivolumab                                                                        | No                        | 330                    |
| CA184-024 <sup>10</sup>      | ICI-C vs C            | 3     | Melanoma                | 1    | Ipilimumab + Dacarbazine, followed by Dacarbazine, followed by Ipilimumab        | No                        | 250                    |
| CA 184-095 <sup>11</sup>     | ICI vs Placebo        | 3     | Prostate                | 1    | Ipilimumab                                                                       | No                        | 400                    |
| Keynote 010 <sup>12</sup>    | ICI vs C              | 2/3   | NSCLC                   | 2    | Pembrolizumab                                                                    | Yes                       | 346                    |
| Keynote 010 <sup>12</sup>    | ICI vs C              | 2/3   | NSCLC                   | 2    | Pembrolizumab                                                                    | Yes                       | 345                    |
| Keynote 024 <sup>13,14</sup> | ICI vs C              | 3     | NSCLC                   | 1    | Pembrolizumab                                                                    | No                        | 154                    |
| Keynote 002 <sup>15,16</sup> | ICI vs C              | 2     | Melanoma                | 3    | Pembrolizumab                                                                    | No                        | 181                    |
| Keynote 002 <sup>15,16</sup> | ICI vs C              | 2     | Melanoma                | 3    | Pembrolizumab                                                                    | No                        | 180                    |
| Keynote 021 <sup>17,18</sup> | ICI-C vs C            | 2     | NSCLC                   | 1    | Pembrolizumab + Carboplatin + Pemetrexed, followed by Pembrolizumab + Pemetrexed | No                        | 60                     |
| OAK <sup>19</sup>            | ICI vs C              | 3     | NSCLC                   | 2    | Atezolizumab                                                                     | No                        | 425                    |
| Poplar <sup>20</sup>         | ICI vs C              | 2     | NSCLC                   | 2    | Atezolizumab                                                                     | No                        | 144                    |
| NCT00257205 <sup>21</sup>    | ICI vs C              | 3     | Melanoma                | 1    | Tremelimumab                                                                     | No                        | 328                    |

|                             |                |   |                               |    |                                                                                                     |     |     |
|-----------------------------|----------------|---|-------------------------------|----|-----------------------------------------------------------------------------------------------------|-----|-----|
| DETERMINE <sup>22</sup>     | ICI vs Placebo | 2 | Malignant Mesothelioma        | 2  | Tremelimumab                                                                                        | No  | 382 |
| CA 184-041 <sup>23</sup>    | ICI-C vs C     | 2 | NSCLC                         | 1  | Carboplatin + Paclitaxel, followed by Ipilimumab + Carboplatin + Paclitaxel, followed by Ipilimumab | No  | 68  |
| CA 184-041 <sup>23</sup>    | ICI-C vs C     | 2 | NSCLC                         | 1  | Ipilimumab+ Carboplatin+ Paclitaxel, followed by Carboplatin + Paclitaxel, followed by Ipilimumab   | No  | 70  |
| CA 184-041 <sup>16</sup>    | ICI-C vs C     | 2 | SCLC                          | 1  | Carboplatin + Paclitaxel, followed by Ipilimumab + Carboplatin + Paclitaxel, followed by Ipilimumab | No  | 45  |
| CA 184-041 <sup>24</sup>    | ICI-C vs C     | 2 | SCLC                          | 1  | Ipilimumab+ Carboplatin+ Paclitaxel, followed by Carboplatin + Paclitaxel, followed by Ipilimumab   | No  | 45  |
| CA 184-056 <sup>25</sup>    | ICI-C vs C     | 3 | SCLC                          | 1  | Ipilimumab + Carboplatin/ Cisplatin and Etoposide, followed by Ipilimumab                           | No  | 566 |
| <b>Validation dataset</b>   |                |   |                               |    |                                                                                                     |     |     |
| IMPower 150 <sup>26</sup>   | ICI-C vs C     | 3 | NSCLC                         | 1  | Atezolizumab + Bevacizumab + Paclitaxel + Carboplatin                                               | No  | 356 |
| Keynote 189 <sup>27</sup>   | ICI-C vs C     | 3 | NSCLC                         | 1  | Pembrolizumab + Platinum + Pemetrexed                                                               | No  | 410 |
| Keynote 407 <sup>28</sup>   | ICI-C vs C     | 3 | NSCLC                         | 1  | Pembrolizumab+ Carboplatin + Paclitaxel/ nab-paclitaxel, followed by Pembrolizumab                  | No  | 278 |
| Checkmate 227 <sup>29</sup> | ICI-C vs C     | 3 | NSCLC                         | 1  | Nivolumab + Chemotherapy                                                                            | No  | 177 |
| IMPassion 130 <sup>30</sup> | ICI-C vs C     | 3 | Triple negative breast cancer | 1  | Atezolizumab + nab-paclitaxel                                                                       | Yes | 451 |
| IMPower 133 <sup>31</sup>   | ICI-C vs C     | 3 | SCLC                          | 1  | Atezolizumab + Carboplatin + Etoposide                                                              | No  | 201 |
| Keynote 048 <sup>32</sup>   | ICI-C vs C     | 3 | Head and Neck SCC             | 1  | Pembrolizumab + Carboplatin/ Cisplatin + 5FU, followed by Pembrolizumab                             | No  | 281 |
| IMPower 131 <sup>33</sup>   | ICI-C vs C     | 3 | NSCLC                         | 1  | Atezolizumab+ Carboplatin + nab-paclitaxel                                                          | No  | 343 |
| IMPower 132 <sup>34</sup>   | ICI-C vs C     | 3 | NSCLC                         | 1  | Atezolizumab + Cisplatin/ Carboplatin + Pemetrexed, followed by Atezolizumab + Pemetrexed           | No  | 292 |
| Kate2 <sup>35</sup>         | ICI-C vs C     | 2 | Triple negative breast cancer | 2+ | Atezolizumab + TDM1                                                                                 | No  | 133 |
| Keynote 062 <sup>36</sup>   | ICI-C vs C     | 3 | Gastric/ Oesophageal          | 1  | Pembrolizumab+ Chemotherapy (Cisplatin + 5FU/ Capecitabine)                                         | Yes | 257 |

|                                   |                |   |                      |    |                                                                       |     |     |
|-----------------------------------|----------------|---|----------------------|----|-----------------------------------------------------------------------|-----|-----|
| IMpower 130 <sup>37</sup>         | ICI-C vs C     | 3 | NSCLC                | 1  | Atezolizumab + Carboplatin + nab-paclitaxel, followed by Atezolizumab | No  | 451 |
| Javelin Renal 101 <sup>38</sup>   | ICI-TKI vs TKI | 3 | Renal                | 1  | Avelumab + Axitinib                                                   | Yes | 270 |
| Keynote 426 <sup>21</sup>         | ICI-TKI vs TKI | 3 | Renal                | 1  | Pembrolizumab + Axitinib                                              | No  | 432 |
| ImBlaze370 <sup>39</sup>          | ICI-TKI vs TKI | 3 | CRC                  | 3  | Atezolizumab + Cobimetinib                                            | No  | 183 |
| CCTG CO.26 <sup>39</sup>          | ICI vs BSC     | 2 | CRC                  | 3+ | Durvalumab + Tremelimumab, followed by Durvalumab                     | No  | 119 |
| Keynote 240 <sup>40</sup>         | ICI vs BSC     | 3 | HCC                  | 2  | Pembrolizumab + BSC                                                   | No  | 278 |
| Checkmate 227 <sup>41</sup>       | ICI vs C       | 3 | NSCLC                | 1  | Ipilimumab + Nivolumab                                                | Yes | 139 |
| Keynote 048 <sup>32</sup>         | ICI vs C       | 3 | Head and Neck SCC    | 1  | Pembrolizumab                                                         | No  | 301 |
| Javelin Lung 200 <sup>42</sup>    | ICI vs C       | 3 | NSCLC                | 2  | Avelumab                                                              | Yes | 264 |
| ARCTIC <sup>43</sup>              | ICI vs C       | 3 | NSCLC                | 3  | Durvalumab                                                            | Yes | 62  |
| ARCTIC <sup>43</sup>              | ICI vs C       | 3 | NSCLC                | 3  | Durvalumab + Tremelimumab, followed by Durvalumab                     | Yes | 174 |
| Checkmate 214 <sup>44</sup>       | ICI vs C       | 3 | Renal                | 1  | Ipilimumab + Nivolumab, followed by Nivolumab                         | No  | 425 |
| IMMOTION 151 <sup>45</sup>        | ICI vs C       | 3 | Renal                | 1  | Atezolizumab + Bevacizumab                                            | Yes | 178 |
| Keynote 040 <sup>46</sup>         | ICI vs C       | 3 | Head and Neck SCC    | 2  | Pembrolizumab                                                         | Yes | 247 |
| Javelin Gastric 300 <sup>47</sup> | ICI vs C       | 3 | Gastric/ Oesophageal | 3  | Avelumab                                                              | No  | 185 |
| IMvigor 211 <sup>48</sup>         | ICI vs C       | 3 | Urothelial           | 2  | Atezolizumab                                                          | Yes | 116 |
| IMMOTION 150 <sup>49</sup>        | ICI vs C       | 2 | Renal                | 1  | Atezolizumab                                                          | Yes | 103 |
| IMMOTION 150 <sup>49</sup>        | ICI vs C       | 2 | Renal                | 1  | Atezolizumab + Bevacizumab                                            | Yes | 101 |
| Checkmate 331 <sup>50</sup>       | ICI vs C       | 3 | SCLC                 | 2  | Nivolumab                                                             | No  | 284 |
| Mystic <sup>51</sup>              | ICI vs C       | 3 | NSCLC                | 1  | Durvalumab + Tremelimumab                                             | Yes | 163 |
| Mystic <sup>51</sup>              | ICI vs C       | 3 | NSCLC                | 1  | Durvalumab                                                            | Yes | 163 |
| Keynote 181 <sup>52, 53</sup>     | ICI vs C       | 3 | Gastric/ Oesophageal | 2  | Pembrolizumab                                                         | Yes | 107 |

|                                  |              |   |                           |     |                                               |     |     |
|----------------------------------|--------------|---|---------------------------|-----|-----------------------------------------------|-----|-----|
| Keynote 061 <sup>54</sup>        | ICI vs C     | 3 | Gastric/<br>Oesophageal   | 2   | Pembrolizumab                                 | Yes | 196 |
| Keynote 042 <sup>55</sup>        | ICI vs C     | 3 | NSCLC                     | 1   | Pembrolizumab                                 | Yes | 637 |
| IMBlaze370 <sup>39</sup>         | ICI vs C     | 3 | CRC                       | 3   | Atezolizumab                                  | No  | 90  |
| EAGLE <sup>56</sup>              | ICI vs C     | 3 | Head and<br>Neck SCC      | 2+  | Durvalumab                                    | No  | 240 |
| EAGLE <sup>56</sup>              | ICI vs C     | 3 | Head and<br>Neck SCC      | 2+  | Durvalumab + Tremelimumab                     | No  | 247 |
| Keynote 062 <sup>36</sup>        | ICI vs C     | 3 | Gastric/<br>Oesophageal   | 1   | Pembrolizumab                                 | Yes | 256 |
| Checkmate 078 <sup>57</sup>      | ICI vs C     | 3 | NSCLC                     | 2   | Nivolumab                                     | No  | 338 |
| Keynote 045 <sup>58</sup>        | ICI vs C     | 3 | Urothelial                | 2   | Pembrolizumab                                 | Yes | 270 |
| Checkmate 067 <sup>59</sup>      | ICI vs ICI   | 3 | Melanoma                  | 1   | Ipilimumab + Nivolumab, followed by Nivolumab | No  | 314 |
| Checkmate 067 <sup>59</sup>      | ICI vs ICI   | 3 | Melanoma                  | 1   | Nivolumab                                     | No  | 316 |
| NCT01927419 <sup>60</sup>        | ICI vs ICI   | 2 | Melanoma                  | 1   | Ipilimumab + Nivolumab, followed by Nivolumab | No  | 72  |
| Keynote 006 <sup>61</sup>        | ICI vs ICI   | 3 | Melanoma                  | 1   | Pembrolizumab                                 | No  | 279 |
| Keynote 006 <sup>61</sup>        | ICI vs ICI   | 3 | Melanoma                  | 1   | Pembrolizumab                                 | No  | 277 |
| NCT01740297 <sup>62</sup>        | ICI vs T-Vec | 2 | Melanoma                  | 1-2 | Ipilimumab + Talimogene laherparepvec         | No  | 98  |
| LUNG-MAP <sup>63</sup>           | ICI vs ICI   | 3 | NSCLC                     | 1-3 | Ipilimumab + Nivolumab                        | No  | 125 |
| IFCT-1501<br>MAPS2 <sup>64</sup> | ICI vs ICI   | 2 | Malignant<br>Mesothelioma | 2+  | Nivolumab                                     | No  | 63  |

Abbreviations: ICI, immune checkpoint inhibitor; C, Chemotherapy; ICI-C, combination of immune checkpoint inhibitor and chemotherapy; ICI-TKI, combination of immune checkpoint inhibitor and tyrosine kinase inhibitor; BSC, best supportive care; PD-L1, programmed death-ligand 1; NSCLC, non-small cell lung cancer; SCLC, small cell lung cancer; CRC, colorectal cancer; SCC, squamous cell carcinoma.

**eTable 3.** Summary of Immune Checkpoint Inhibitor Arms in Included Trials

| Summary of ICI arms                   | Training dataset (n=25) | Validation dataset (n=49) | Combined dataset (n=74) |
|---------------------------------------|-------------------------|---------------------------|-------------------------|
| <b>Phase</b>                          |                         |                           |                         |
| 3                                     | 14 (56)                 | 42 (86)                   | 56 (76)                 |
| 2 or 2/3                              | 11 (44)                 | 7 (14)                    | 18 (24)                 |
| <b>ICI regimen</b>                    |                         |                           |                         |
| ICI combined with chemotherapy or TKI | 8 (32)                  | 15 (30)                   | 23 (31)                 |
| ICI-only (singlet/ doublet)           | 17 (68)                 | 34 (70)                   | 51 (69)                 |
| <b>Line of treatment</b>              |                         |                           |                         |
| First line                            | 12 (48)                 | 28 (57)                   | 40 (54)                 |
| Second and subsequent line            | 13 (52)                 | 21 (43)                   | 34 (46)                 |
| <b>Tumour</b>                         |                         |                           |                         |
| Melanoma                              | 6 (24)                  | 6 (12)                    | 12 (16)                 |
| NSCLC                                 | 11 (44)                 | 16 (33)                   | 27 (36)                 |
| Others                                | 8 (32)                  | 27 (55)                   | 35 (47)                 |
| <b>PD-L1 selection</b>                |                         |                           |                         |
| PD-L1 selected                        | 3 (12)                  | 19 (39)                   | 22 (30)                 |
| PD-L1 unselected                      | 22 (88)                 | 30 (61)                   | 52 (70)                 |

Note. Values are No. (%) unless otherwise indicated.

Abbreviation: ICI, immune checkpoint inhibitor; PD-L1, programmed death-ligand 1; NSCLC, non-small cell lung cancer

**eFigure 1.** Six-Month Progression Free Survival Model–Predicted vs Observed 12-Month Overall Survival in Immune Checkpoint Inhibitor Arms in the Subgroups and Validation Trial Data Set

**A. ICI-only**

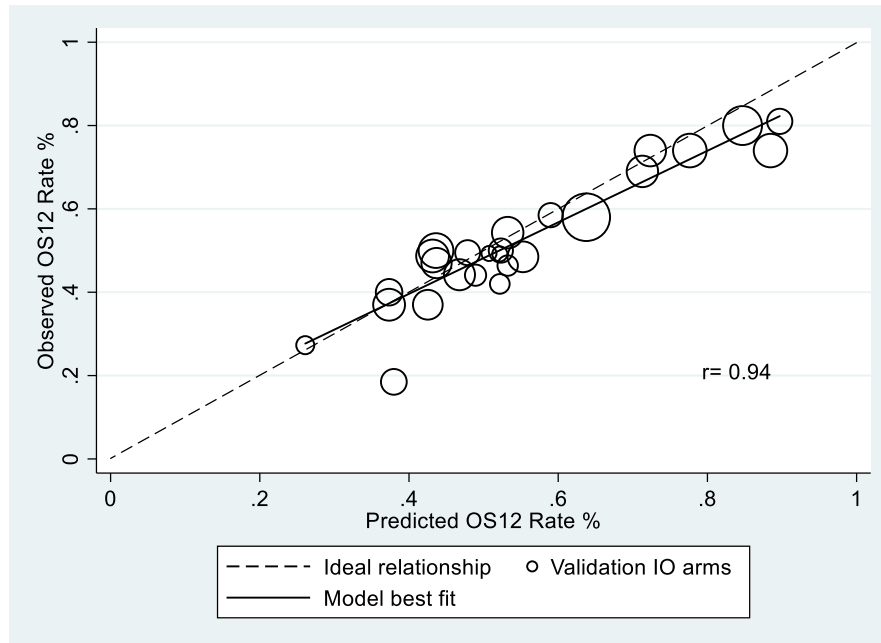

**B. ICI-C**

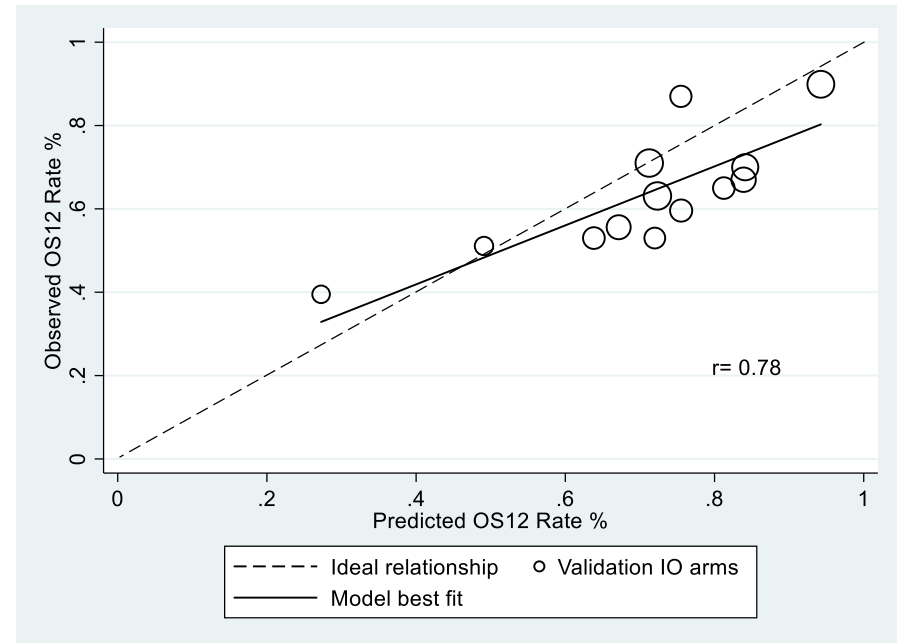



### C. First line

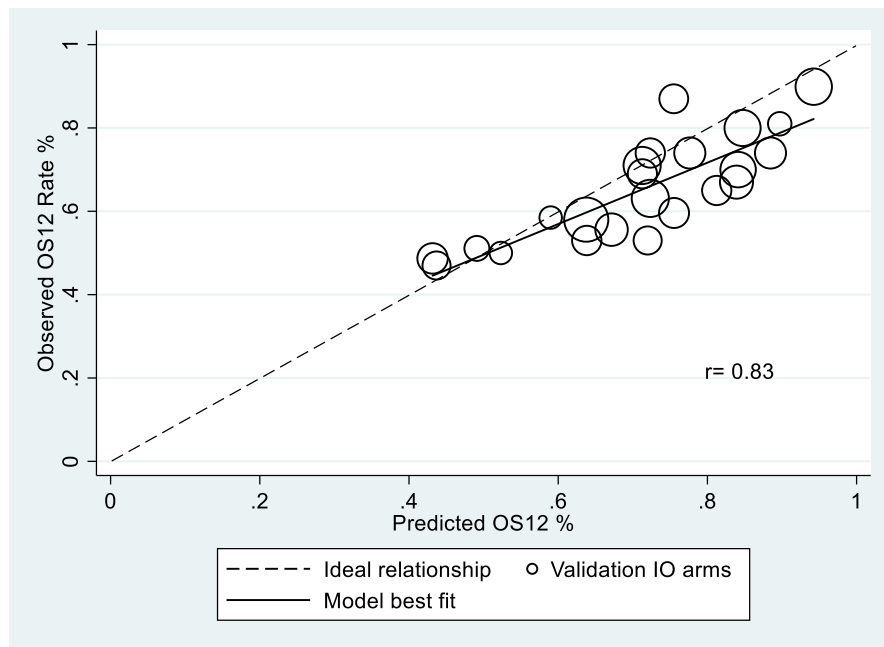

### D. Second and subsequent line

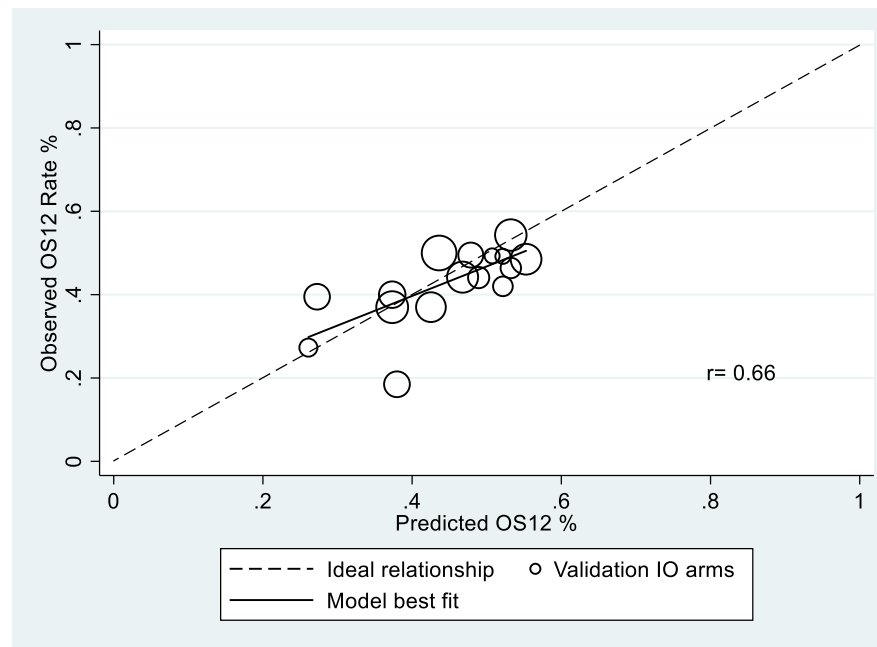

### E. PD-L1 selected

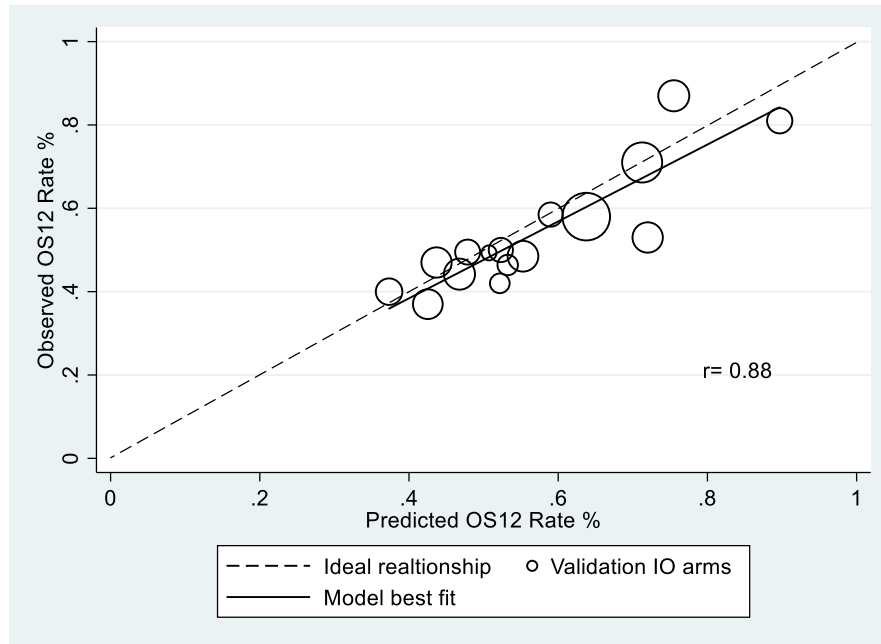

### F. PD-L1 unselected

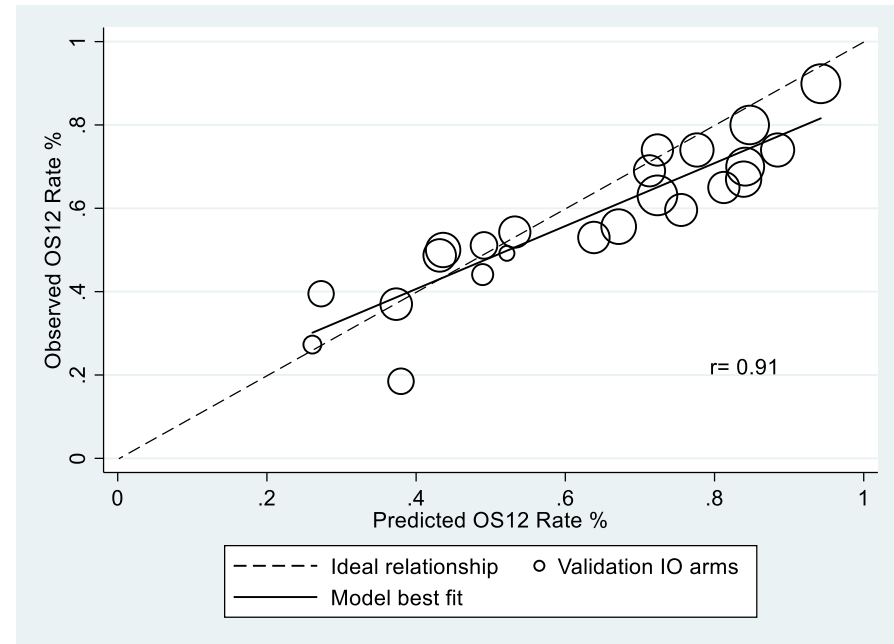

A: ICI-only B: ICI-C C: First line. D: Second and subsequent line. E. PD-L1 selected. F. PD-L1 unselected. Size of each circle represents size of immune checkpoint inhibitor arm.

Abbreviations: PFS6, 6-month progression-free survival; OS, overall survival; OS12, 12-month overall survival rate; ICI, immune checkpoint inhibitor; ICI-C, combination of immune checkpoint inhibitor and chemotherapy or tyrosine kinase inhibitor; PD-L1, programmed death-ligand 1

**eFigure 2.** Objective Response Rate Model–Predicted vs Observed 12-Month Overall Survival in Immune Checkpoint Inhibitor Arms in the Subgroups and Validation Trial Data Set

**A. ICI-only**

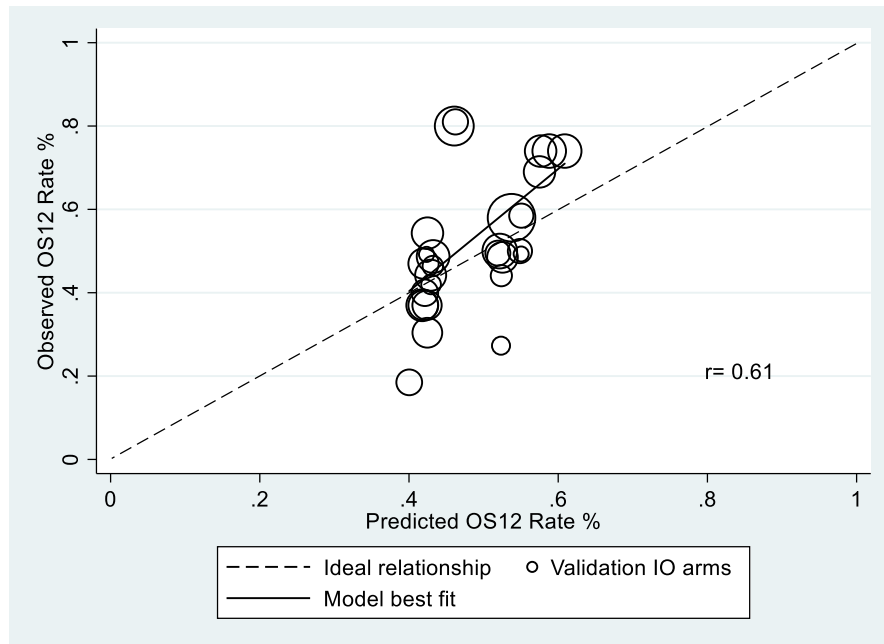

**B. ICI-C**

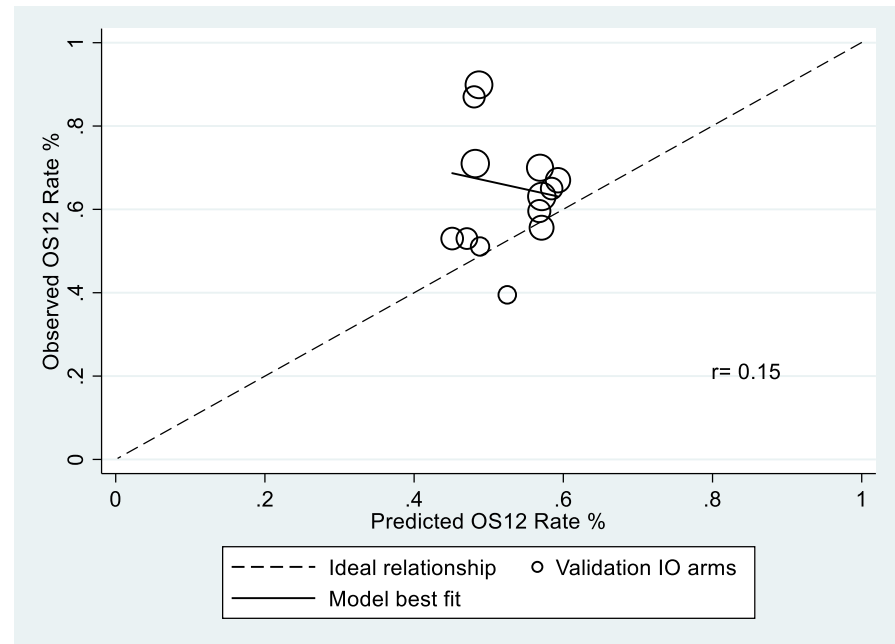

### C. First line

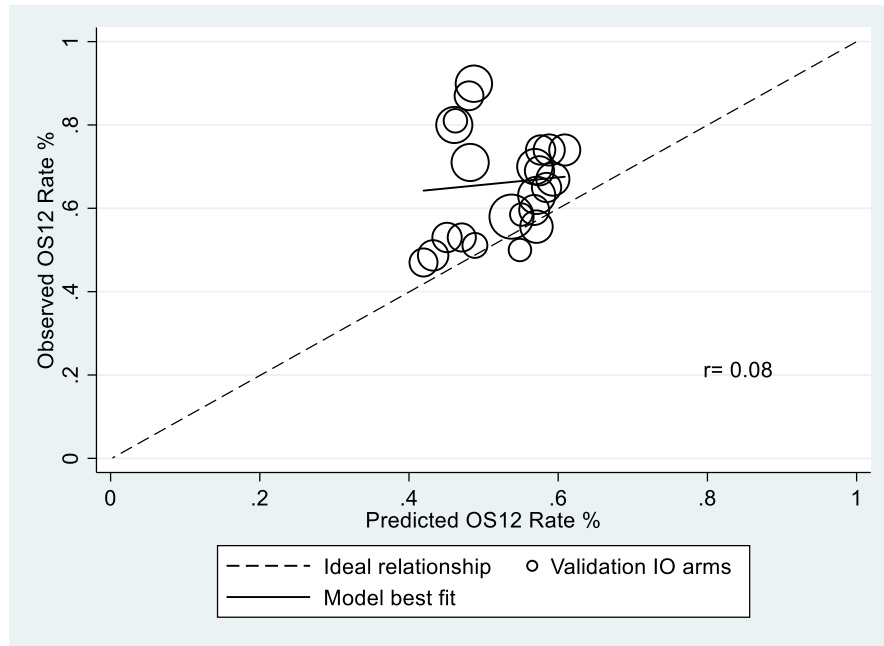

### D. Second and subsequent line

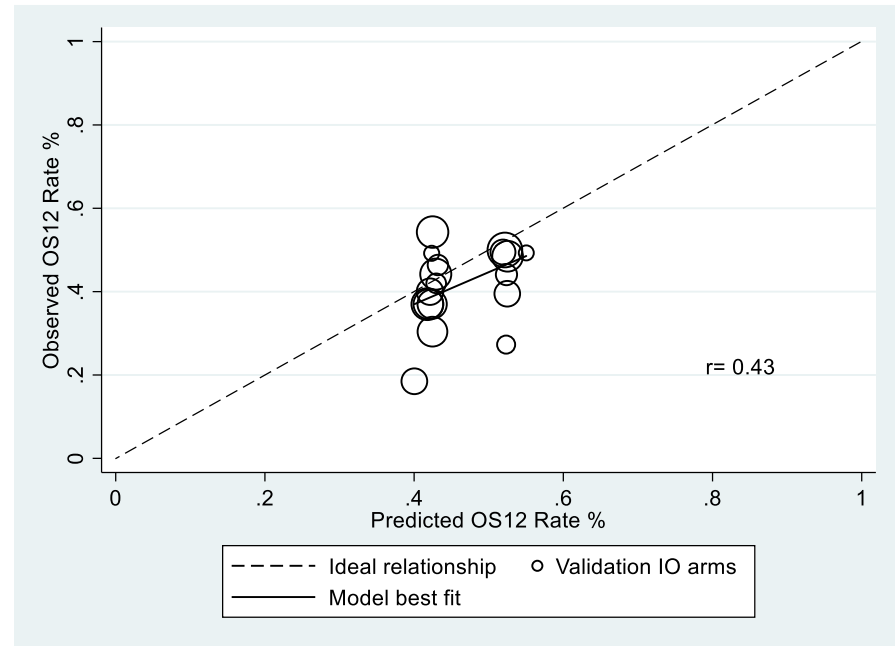

### E. PD-L1 selected

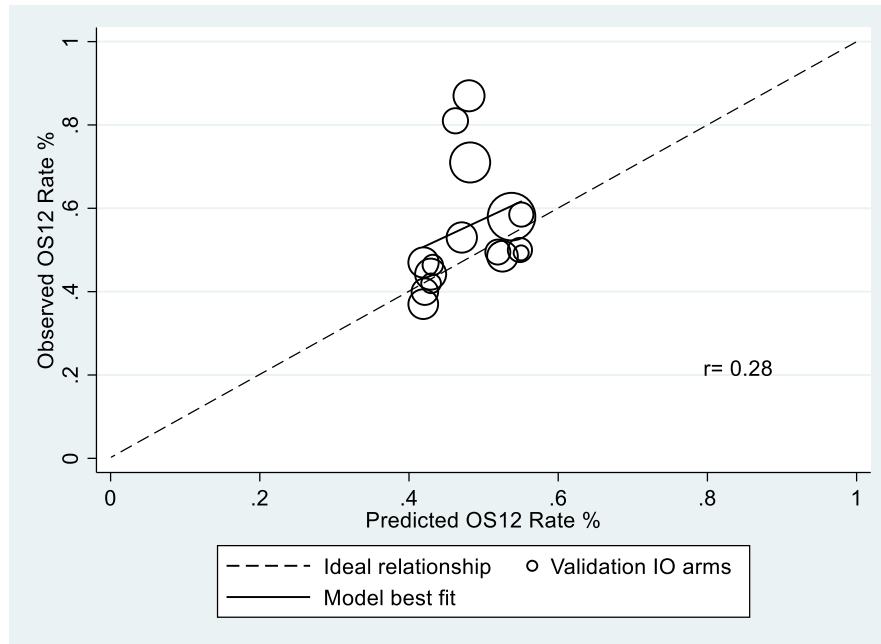

### F. PD-L1 unselected

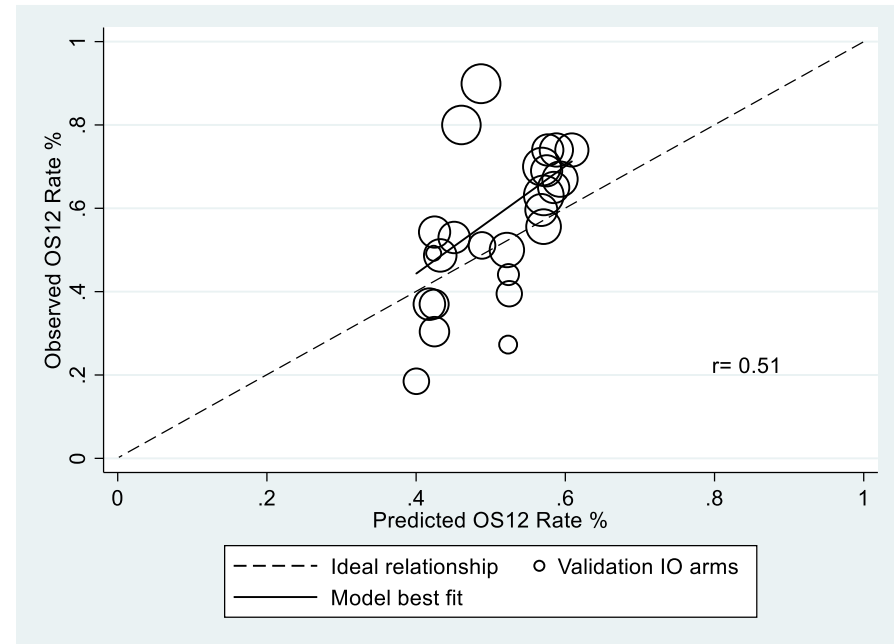

A: ICI-only B: ICI-C C: First line D: Second and subsequent line E. PD-L1 selected F. PD-L1 unselected. Size of each circle represents size of immune checkpoint inhibitor arm.

Abbreviations: ORR, objective response rate; OS, overall survival; OS12, 12-month overall survival rate; ICI, immune checkpoint inhibitor; ICI-C, combination of immune checkpoint inhibitor and chemotherapy or tyrosine kinase inhibitor; PD-L1, programmed death-ligand 1.

**eFigure 3.** Correlations Between Objective Response Rate and 12-Month Overall Survival in Immune Checkpoint Inhibitor Arms in the Subgroups and Entire Trial Data Set

**A. ICI-only**

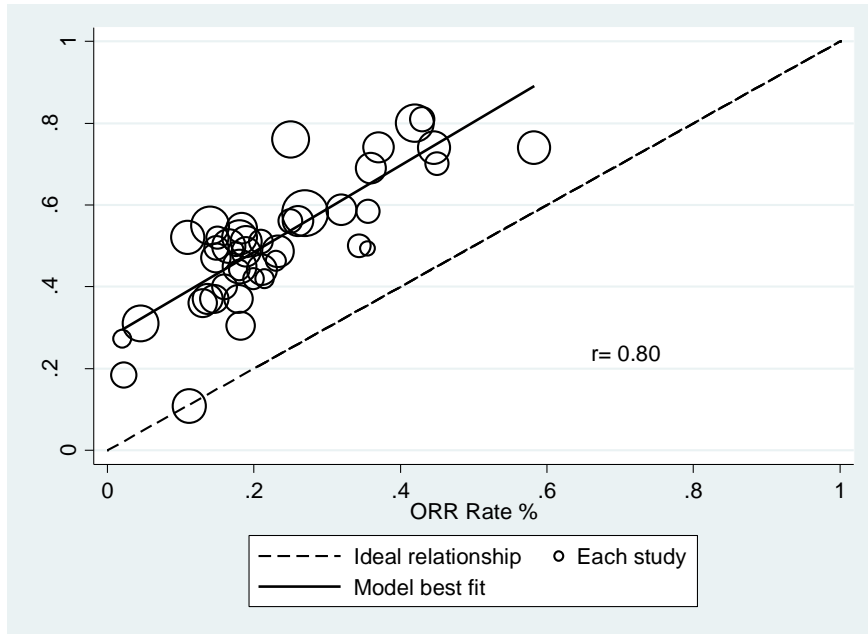

**B. ICI-C**

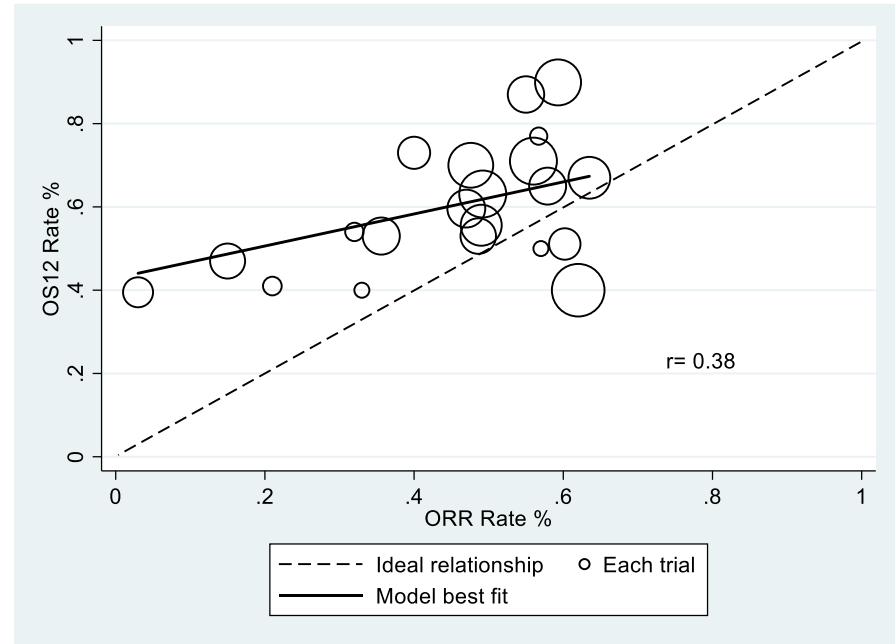

### C. Second and subsequent line

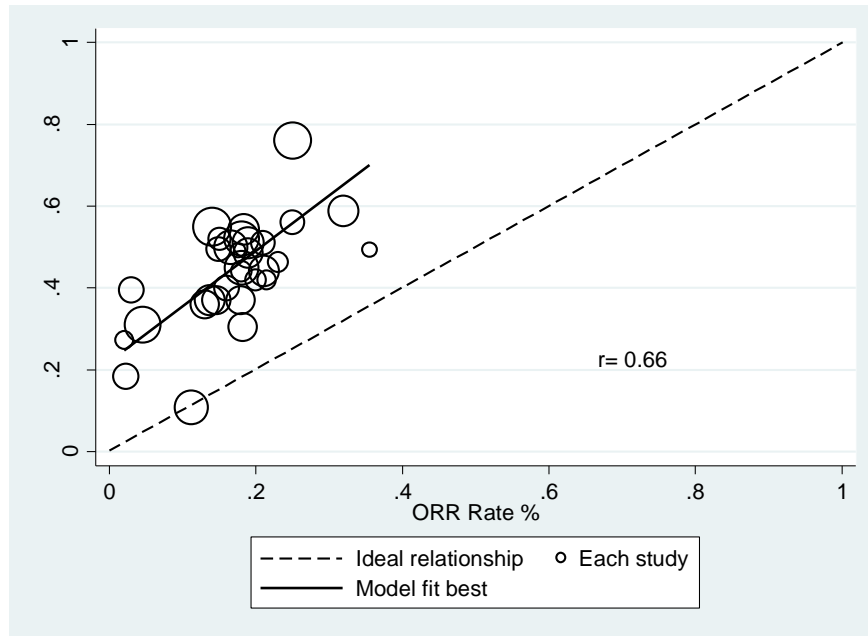

### D. First line

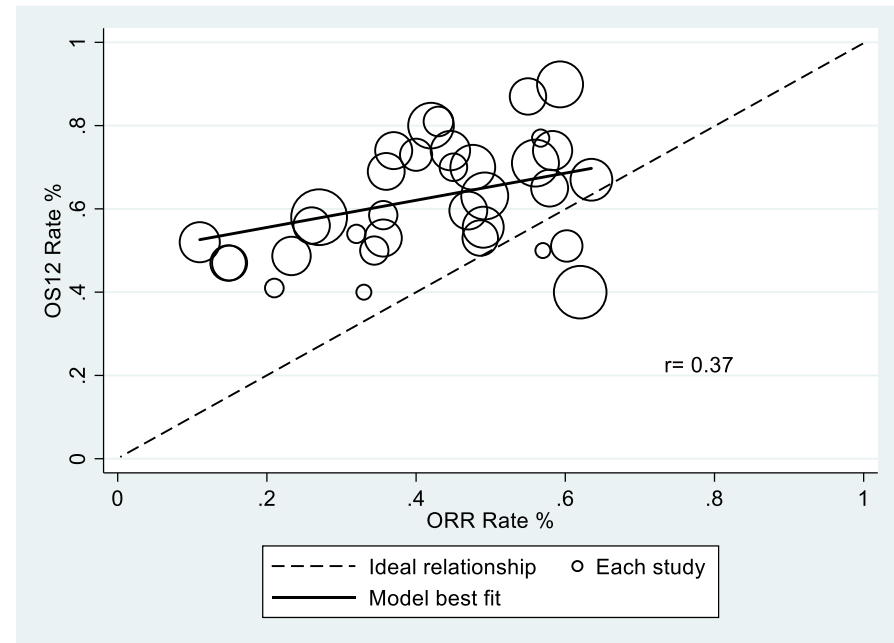

A: ICI-only B: ICI-C C: First line D: Second and subsequent line. Size of each circle represents size of immune checkpoint inhibitor arm.

Abbreviations: ORR, objective response rate; OS, overall survival; OS12, 12-month overall survival rate; ICI, immune checkpoint inhibitor; ICI-C, combination of immune checkpoint inhibitor and chemotherapy or tyrosine kinase inhibitor.

## References.

1. Brahmer J, et al. Nivolumab versus Docetaxel in Advanced Squamous-Cell Non–Small-Cell Lung Cancer. *New England Journal of Medicine*. 2015;373:123-35.
2. Motzer RJ, et al. Nivolumab versus Everolimus in Advanced Renal-Cell Carcinoma. *New England Journal of Medicine*. 2015;373:1803-13.
3. Weber JS, et al. Nivolumab versus chemotherapy in patients with advanced melanoma who progressed after anti-CTLA-4 treatment (CheckMate 037): a randomised, controlled, open-label, phase 3 trial. *The Lancet Oncology*. 2015;16:375-84.
4. Larkin J, et al. Overall Survival in Patients With Advanced Melanoma Who Received Nivolumab Versus Investigator's Choice Chemotherapy in CheckMate 037: A Randomized, Controlled, Open-Label Phase III Trial. *J Clin Oncol*. 2018;36:383-90.
5. Borghaei H, et al. Nivolumab versus Docetaxel in Advanced Nonsquamous Non–Small-Cell Lung Cancer. *New England Journal of Medicine*. 2015;373:1627-39.
6. Ferris RL, et al. Nivolumab for Recurrent Squamous-Cell Carcinoma of the Head and Neck. *New England Journal of Medicine*. 2016;375:1856-67.
7. Robert C, et al. Nivolumab in Previously Untreated Melanoma without BRAF Mutation. *New England Journal of Medicine*. 2014;372:320-30.
8. Carbone DP, et al. First-Line Nivolumab in Stage IV or Recurrent Non-Small-Cell Lung Cancer. *N Engl J Med*. 2017;376:2415-26.
9. Kang YK, et al. Nivolumab in patients with advanced gastric or gastro-oesophageal junction cancer refractory to, or intolerant of, at least two previous chemotherapy regimens (ONO-4538-12, ATTRACTION-2): a randomised, double-blind, placebo-controlled, phase 3 trial. *Lancet*. 2017;390:2461-71.
10. Robert C, et al. Ipilimumab plus Dacarbazine for Previously Untreated Metastatic Melanoma. *New England Journal of Medicine*. 2011;364:2517-26.
11. Beer TM, et al. Randomized, Double-Blind, Phase III Trial of Ipilimumab Versus Placebo in Asymptomatic or Minimally Symptomatic Patients With Metastatic Chemotherapy-Naive Castration-Resistant Prostate Cancer. *J Clin Oncol*. 2017;35:40-7.
12. Herbst RS, et al. Pembrolizumab versus docetaxel for previously treated, PD-L1-positive, advanced non-small-cell lung cancer (KEYNOTE-010): a randomised controlled trial. *The Lancet*. 2016;387:1540-50.
13. Reck M, et al. Pembrolizumab versus Chemotherapy for PD-L1-Positive Non-Small-Cell Lung Cancer. *N Engl J Med*. 2016;375:1823-33.
14. Reck M, et al. Updated Analysis of KEYNOTE-024: Pembrolizumab Versus Platinum-Based Chemotherapy for Advanced Non-Small-Cell Lung Cancer With PD-L1 Tumor Proportion Score of 50% or Greater. *J Clin Oncol*. 2019;37:537-46.
15. Ribas A, et al. Pembrolizumab versus investigator-choice chemotherapy for ipilimumab-refractory melanoma (KEYNOTE-002): a randomised, controlled, phase 2 trial. *The Lancet Oncology*. 2015;16:908-18.
16. Hamid O, et al. Final analysis of a randomised trial comparing pembrolizumab versus investigator-choice chemotherapy for ipilimumab-refractory advanced melanoma. *Eur J Cancer*. 2017;86:37-45.
17. Langer CJ, et al. Carboplatin and pemetrexed with or without pembrolizumab for advanced, non-squamous non-small-cell lung cancer: a randomised, phase 2 cohort of the open-label KEYNOTE-021 study. *The Lancet Oncology*. 2016;17:1497-508.
18. Borghaei H, et al. 24-Month Overall Survival from KEYNOTE-021 Cohort G: Pemetrexed and Carboplatin with or without Pembrolizumab as First-Line Therapy for Advanced Nonsquamous Non–Small Cell Lung Cancer. *Journal of Thoracic Oncology*. 2019;14:124-9.



19. Rittmeyer A, et al. Atezolizumab versus docetaxel in patients with previously treated non-small-cell lung cancer (OAK): a phase 3, open-label, multicentre randomised controlled trial. *The Lancet*. 2017;389:255-65.
20. Fehrenbacher L, et al. Atezolizumab versus docetaxel for patients with previously treated non-small-cell lung cancer (POPLAR): a multicentre, open-label, phase 2 randomised controlled trial. *The Lancet*. 2016;387:1837-46.
21. Ribas A, et al. Phase III randomized clinical trial comparing tremelimumab with standard-of-care chemotherapy in patients with advanced melanoma. *J Clin Oncol*. 2013;31:616-22.
22. Maio M, et al. Tremelimumab as second-line or third-line treatment in relapsed malignant mesothelioma (DETERMINE): a multicentre, international, randomised, double-blind, placebo-controlled phase 2b trial. *The Lancet Oncology*. 2017;18:1261-73.
23. Lynch TJ, et al. Ipilimumab in combination with paclitaxel and carboplatin as first-line treatment in stage IIIB/IV non-small-cell lung cancer: results from a randomized, double-blind, multicenter phase II study. *J Clin Oncol*. 2012;30:2046-54.
24. Reck M, et al. Ipilimumab in combination with paclitaxel and carboplatin as first-line therapy in extensive-disease-small-cell lung cancer: results from a randomized, double-blind, multicenter phase 2 trial. *Ann Oncol*. 2013;24:75-83.
25. Reck M, et al. Pembrolizumab versus Chemotherapy for PD-L1–Positive Non–Small-Cell Lung Cancer. *New England Journal of Medicine*. 2016;375:1823-33.
26. Socinski MA, et al. Atezolizumab for First-Line Treatment of Metastatic Nonsquamous NSCLC. *New England Journal of Medicine*. 2018;378:2288-301.
27. Gandhi L, et al. Pembrolizumab plus Chemotherapy in Metastatic Non–Small-Cell Lung Cancer. *New England Journal of Medicine*. 2018;378:2078-92.
28. Paz-Ares L, et al. Pembrolizumab plus Chemotherapy for Squamous Non–Small-Cell Lung Cancer. *New England Journal of Medicine*. 2018;379:2040-51.
29. Borghaei H, et al. Nivolumab (Nivo) + platinum-doublet chemotherapy (Chemo) vs chemo as first-line (1L) treatment (Tx) for advanced non-small cell lung cancer (NSCLC) with <1% tumor PD-L1 expression: Results from CheckMate 227. *Journal of Clinical Oncology*. 2018;36:9001-.
30. Schmid P, et al. Atezolizumab and Nab-Paclitaxel in Advanced Triple-Negative Breast Cancer. *New England Journal of Medicine*. 2018;379:2108-21.
31. Horn L, et al. First-Line Atezolizumab plus Chemotherapy in Extensive-Stage Small-Cell Lung Cancer. *New England Journal of Medicine*. 2018;0:null.
32. Rischin D, et al. Protocol-specified final analysis of the phase 3 KEYNOTE-048 trial of pembrolizumab (pembro) as first-line therapy for recurrent/metastatic head and neck squamous cell carcinoma (R/M HNSCC). *Journal of Clinical Oncology*. 2019;37:6000-.
33. Jotte RM, et al. IMpower131: Primary PFS and safety analysis of a randomized phase III study of atezolizumab + carboplatin + paclitaxel or nab-paclitaxel vs carboplatin + nab-paclitaxel as 1L therapy in advanced squamous NSCLC. *Journal of Clinical Oncology*. 2018;36:LBA9000-LBA.
34. Papadimitrakopoulou V, et al. OA05.07 IMpower132: PFS and Safety Results with 1L Atezolizumab + Carboplatin/Cisplatin + Pemetrexed in Stage IV Non-Squamous NSCLC. *Journal of Thoracic Oncology*. 2018;13:S332-S3.
35. Emens L, et al. Abstract PD3-01: Results from KATE2, a randomized phase 2 study of atezolizumab (atezo)+trastuzumab emtansine (T-DM1) vs placebo (pbo)+T-DM1 in previously treated HER2+ advanced breast cancer (BC). *Cancer Research*. 2019;79:PD3-01-PD3-.

36. Tabernero J, et al. Pembrolizumab with or without chemotherapy versus chemotherapy for advanced gastric or gastroesophageal junction (G/GEJ) adenocarcinoma: The phase III KEYNOTE-062 study. *Journal of Clinical Oncology*. 2019;37:LBA4007-LBA.
37. West H, et al. Atezolizumab in combination with carboplatin plus nab-paclitaxel chemotherapy compared with chemotherapy alone as first-line treatment for metastatic non-squamous non-small-cell lung cancer (IMpower130): a multicentre, randomised, open-label, phase 3 trial. *Lancet Oncol*. 2019;20:924-37.
38. Motzer RJ, et al. Avelumab plus Axitinib versus Sunitinib for Advanced Renal-Cell Carcinoma. *New England Journal of Medicine*. 2019;380:1103-15.
39. Eng C, et al. Atezolizumab with or without cobimetinib versus regorafenib in previously treated metastatic colorectal cancer (IMblaze370): a multicentre, open-label, phase 3, randomised, controlled trial. *The Lancet Oncology*. 2019;20:849-61.
40. Finn RS, et al. Results of KEYNOTE-240: phase 3 study of pembrolizumab (Pembro) vs best supportive care (BSC) for second line therapy in advanced hepatocellular carcinoma (HCC). *Journal of Clinical Oncology*. 2019;37:4004-.
41. Hellmann MD, et al. Nivolumab plus Ipilimumab in Lung Cancer with a High Tumor Mutational Burden. *New England Journal of Medicine*. 2018;378:2093-104.
42. Barlesi F, et al. Avelumab versus docetaxel in patients with platinum-treated advanced non-small-cell lung cancer (JAVELIN Lung 200): an open-label, randomised, phase 3 study. *The Lancet Oncology*. 2018;19:1468-79.
43. Kowalski DM, et al. 1378OARCTIC: Durvalumab + tremelimumab and durvalumab monotherapy vs SoC in  $\geq 3L$  advanced NSCLC treatment. *Annals of Oncology*. 2018;29.
44. Motzer RJ, et al. Nivolumab plus Ipilimumab versus Sunitinib in Advanced Renal-Cell Carcinoma. *New England Journal of Medicine*. 2018;378:1277-90.
45. Motzer RJ, et al. IMmotion151: A Randomized Phase III Study of Atezolizumab Plus Bevacizumab vs Sunitinib in Untreated Metastatic Renal Cell Carcinoma (mRCC). *Journal of Clinical Oncology*. 2018;36:578-.
46. Cohen EEW, et al. Pembrolizumab versus methotrexate, docetaxel, or cetuximab for recurrent or metastatic head-and-neck squamous cell carcinoma (KEYNOTE-040): a randomised, open-label, phase 3 study. *The Lancet*. 2019;393:156-67.
47. Bang YJ, et al. Phase III, randomised trial of avelumab versus physician's choice of chemotherapy as third-line treatment of patients with advanced gastric or gastro-oesophageal junction cancer: primary analysis of JAVELIN Gastric 300. *Ann Oncol*. 2018;29:2052-60.
48. Powles T, et al. Atezolizumab versus chemotherapy in patients with platinum-treated locally advanced or metastatic urothelial carcinoma (IMvigor211): a multicentre, open-label, phase 3 randomised controlled trial. *The Lancet*. 2018;391:748-57.
49. McDermott DF, et al. Clinical activity and molecular correlates of response to atezolizumab alone or in combination with bevacizumab versus sunitinib in renal cell carcinoma. *Nat Med*. 2018;24:749-57.
50. Reck M, et al. LBA5Efficacy and safety of nivolumab (nivo) monotherapy versus chemotherapy (chemo) in recurrent small cell lung cancer (SCLC): Results from CheckMate 331. *Annals of Oncology*. 2018;29.
51. Rizvi NA, et al. LBA6Durvalumab with or without tremelimumab vs platinum-based chemotherapy as first-line treatment for metastatic non-small cell lung cancer: MYSTIC. *Annals of Oncology*. 2018;29.
52. Kojima T, et al. Pembrolizumab versus chemotherapy as second-line therapy for advanced esophageal cancer: Phase III KEYNOTE-181 study. *Journal of Clinical Oncology*. 2019;37:2-.

53. Shah MA, et al. Pembrolizumab versus chemotherapy as second-line therapy for advanced esophageal cancer: Phase 3 KEYNOTE-181 study. *Journal of Clinical Oncology*. 2019;37:4010-.
54. Shitara K, et al. Pembrolizumab versus paclitaxel for previously treated, advanced gastric or gastro-oesophageal junction cancer (KEYNOTE-061): a randomised, open-label, controlled, phase 3 trial. *Lancet*. 2018;392:123-33.
55. Mok TSK, et al. Pembrolizumab versus chemotherapy for previously untreated, PD-L1-expressing, locally advanced or metastatic non-small-cell lung cancer (KEYNOTE-042): a randomised, open-label, controlled, phase 3 trial. *Lancet*. 2019;393:1819-30.
56. Licitra LF, et al. EAGLE: A phase 3, randomized, open-label study of durvalumab (D) with or without tremelimumab (T) in patients (pts) with recurrent or metastatic head and neck squamous cell carcinoma (R/M HNSCC). *Journal of Clinical Oncology*. 2019;37:6012-.
57. Wu YL, et al. Nivolumab Versus Docetaxel in a Predominantly Chinese Patient Population With Previously Treated Advanced NSCLC: CheckMate 078 Randomized Phase III Clinical Trial. *J Thorac Oncol*. 2019;14:867-75.
58. Bellmunt J, et al. Pembrolizumab as Second-Line Therapy for Advanced Urothelial Carcinoma. *New England Journal of Medicine*. 2017;376:1015-26.
59. Hodi FS, et al. Nivolumab plus ipilimumab or nivolumab alone versus ipilimumab alone in advanced melanoma (CheckMate 067): 4-year outcomes of a multicentre, randomised, phase 3 trial. *Lancet Oncol*. 2018;19:1480-92.
60. Postow MA, et al. Nivolumab and ipilimumab versus ipilimumab in untreated melanoma. *N Engl J Med*. 2015;372:2006-17.
61. Schachter J, et al. Pembrolizumab versus ipilimumab for advanced melanoma: final overall survival results of a multicentre, randomised, open-label phase 3 study (KEYNOTE-006). *The Lancet*. 2017;390:1853-62.
62. Chesney J, et al. Randomized, Open-Label Phase II Study Evaluating the Efficacy and Safety of Talimogene Laherparepvec in Combination With Ipilimumab Versus Ipilimumab Alone in Patients With Advanced, Unresectable Melanoma. *J Clin Oncol*. 2018;36:1658-67.
63. Bazhenova L, et al. A phase III randomized study of nivolumab plus ipilimumab versus nivolumab for previously treated patients with stage IV squamous cell lung cancer and no matching biomarker (Lung-MAP Sub-Study S1400I, NCT02785952). *Journal of Clinical Oncology*. 2019;37:9014-.
64. Scherpereel A, et al. Nivolumab or nivolumab plus ipilimumab in patients with relapsed malignant pleural mesothelioma (IFCT-1501 MAPS2): a multicentre, open-label, randomised, non-comparative, phase 2 trial. *Lancet Oncol*. 2019;20:239-53.
